# Supplementary material for: Stability and Formulation of Erlotinib in Skin Creams
Source: MDPI journal article supplement (doi:10.3390/molecules27031070), 2022-02-05
Supplement: s1 [file s1]

# Stability and Formulation of Erlotinib in Skin Creams

David Nguyen <sup>1,†</sup>, Philippe-Henri Secrétan <sup>1,2,†</sup>, Camille Cotteret <sup>1</sup>, Emmanuelle Jacques-Gustave <sup>1</sup>, Céline Greco <sup>3,4</sup>, Christine Bodemer <sup>4,5</sup>, Joel Schlatter <sup>1,6,\*</sup>,† and Salvatore Cisternino <sup>1,7,\*</sup>,†

## Supplemental Results of the stress testing study

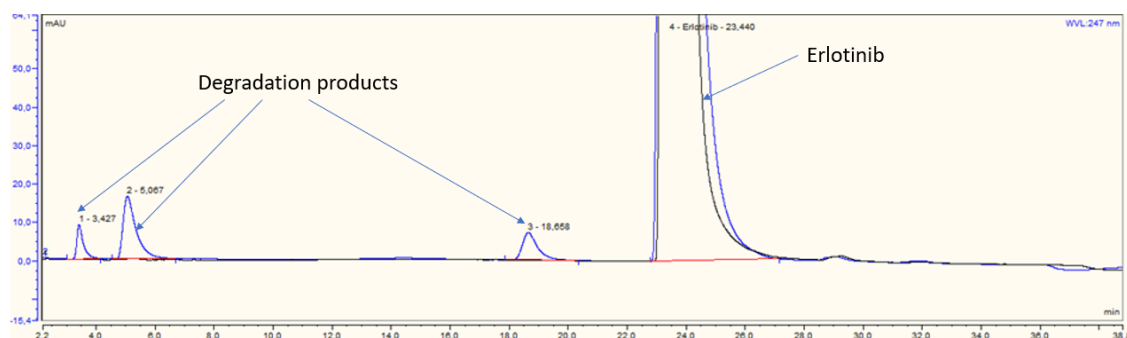

**Figure S1:** HPLC chromatograms of ERL in acidic conditions. Black chromatogram: the solution analyzed just after exposure to acidic conditions. Blue chromatogram: same solution analyzed after 21 days of exposure to acidic conditions.

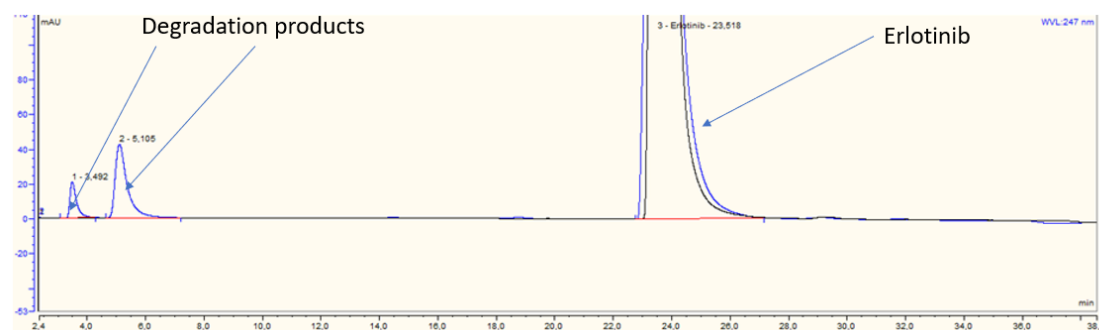

**Figure S2:** HPLC chromatograms of ERL in alkaline conditions. Black chromatogram: the solution analyzed just after exposure to alkaline conditions. Blue chromatogram: same solution analyzed after 21 days of exposure to alkaline conditions.

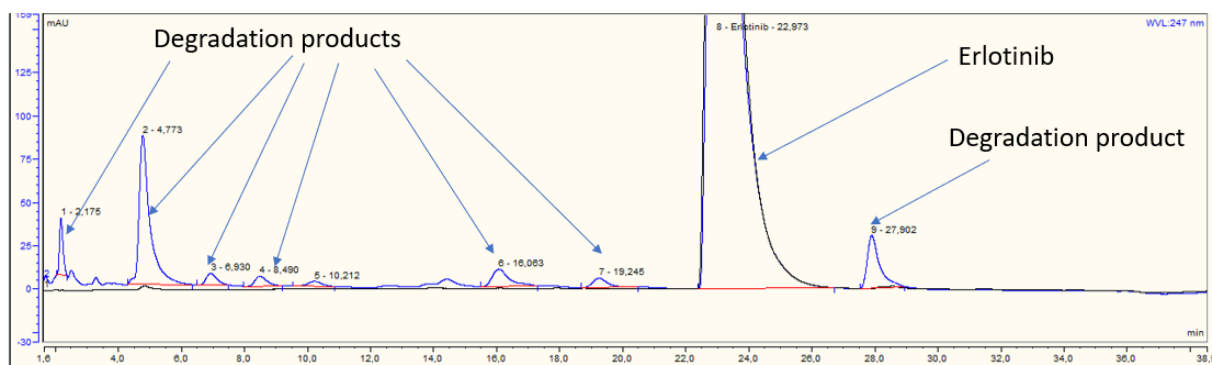

**Figure S3:** HPLC chromatograms of ERL in oxidative conditions. Black chromatogram: the solution analyzed just after exposure to oxidative conditions. Blue chromatogram: same solution analyzed after 8 hours of exposure to oxidative conditions.

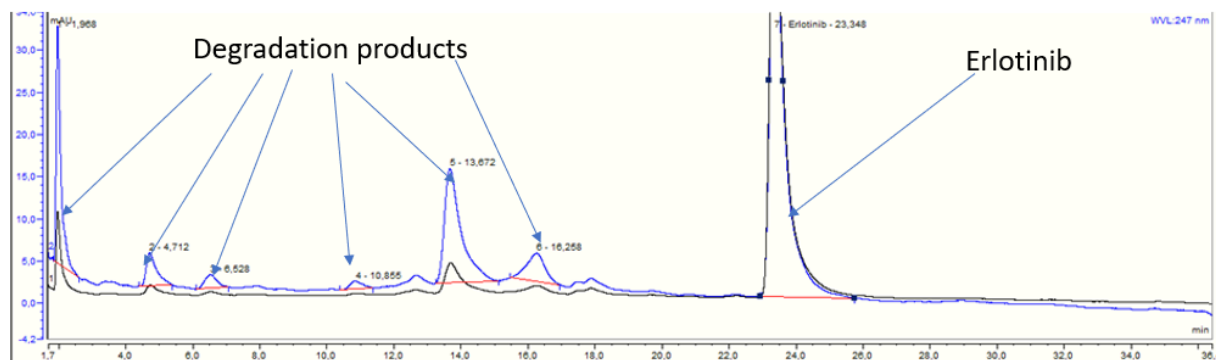

**Figure S4:** HPLC chromatograms of ERL in photolytic conditions. Black chromatogram: the solution analyzed prior to exposure to photolytic conditions. Blue chromatogram: same solution analyzed after 24 hours to simulated light.
